# Supplementary material
Source: publisher site journal article supplement (https://www.dovepress.com/article/237586)
Supplement: Supplementary file 1 [file get_supplementary_file.php]

**Supplemental Table 1 (for Figure 1 and 3)** Number of eyes, absolute values and mean change in visual acuity in ETDRS letters, absolute and mean change in central retinal thickness in µm and mean total macular volume in mm3 for all observation timepoints. P-Value indicates results of Wilcoxon Rank-Sum test when comparing changes to baseline.

| **Time (days)** | |  | **30** | **60** | **90** | **120** | **150** | **180** | **360** | **540** | **720** |
| --- | --- | --- | --- | --- | --- | --- | --- | --- | --- | --- | --- |
| **N** | | 139 | 129 | 129 | 122 | 115 | 106 | 99 | 91 | 56 | 31 |
| **VA** | | 60.11 | 63.11 | 64.26 | 64.74 | 64.33 | 64.6 | 65.33 | 64.88 | 65.36 | 69.31 |
| **Change in VA** | |  | 3,00 | 4,15 | 4,63 | 4,22 | 4,49 | 5,22 | 4,77 | 5,25 | 9,20 |
| **p-value** | |  | 0,133 | 0,024* | 0,011* | 0,017* | 0,012* | ≤0,01* | ≤0,01* | 0,031* | ≤0,01* |
| **CRT** | | 419 | 342 | 324 | 318 | 317 | 307 | 302 | 298 | 312 | 319 |
| **Change in CRT** | |  | -77 | -95 | -101 | -102 | -112 | -117 | -121 | -107 | -100 |
| **p-value** | |  | ≤0,01* | ≤0,01* | ≤0,01* | ≤0,01* | ≤0,01* | ≤0,01* | ≤0,01* | ≤0,01* | ≤0,01* |
| **TVOL** | | 10.12 | 9.42 | 9.22 | 9.14 | 9.08 | 9.01 | 9.00 | 8.96 | 9.06 | 9.01 |
| **p-value** | |  | ≤0,01* | ≤0,01* | ≤0,01* | ≤0,01* | ≤0,01* | ≤0,01* | ≤0,01* | ≤0,01* | ≤0,01* |
|  | Note: * indicates a statistically significant difference from baseline was detected  N = Number of eyes  VA = Visual acuity  CRT = Central retinal thickness  TVOL = total macular volume | | | | | | | | | | |

**Supplemental Table 2 (for Figure 2)** Number (n) and amount (%) of eyes with a certain amount of loss/gain in ETDRS letters after one and two years

|  | One year | Two years |
| --- | --- | --- |
| Loss of ≥ 15 letters | 2 (2.2%) | 0 (0%) |
| Loss of ≥ 10 letters | 6 (6.6%) | 1 (3,2%) |
| Gain of ≥ 10 letters | 24 (26.4%) | 11 (35,5%) |
| Gain of ≥ 15 letters | 15 (16.5%) | 9 (29.0%) |

**Supplemental Table 3 (for Figure 4):** Change in visual acuity in ETDRS letters and central retinal thickness in µm stratified by baseline visual acuity (< 60 vs. ≥ 60 ETDRS letters) over all observation timepoints. P-Value indicates results of Wilcoxon Rank-Sum test when comparing changes to baseline.

| **Time (days)** | **30** | **60** | **90** | **120** | **150** | **180** | **360** | **540** | **720** |
| --- | --- | --- | --- | --- | --- | --- | --- | --- | --- |
| **Change in VA in < 60 letters group** | 4,57 | 6,25 | 6,66 | 6,66 | 6,89 | 7,58 | 6,36 | 5,68 | 16,01 |
| **p-value** | 0,058 | 0,014* | ≤0,01* | ≤0,01* | ≤0,01* | ≤0,01* | ≤0,01* | 0.032* | ≤0,01* |
| **Change in VA in ≥ 60 letters group** | 0,92 | 1,63 | 1,93 | 1,52 | 1,84 | 1,97 | 2,3 | 2,58 | 1,67 |
| **p-value** | 0,32 | 0,056 | 0,017* | 0,05* | 0,027* | 0,03* | 0,011* | 0,042* | 0,061 |
| **Change in CRT in < 60 letters group** | -113 | -144 | -150 | -159 | -170 | -177 | -177 | -142 | -111 |
| **p-value** | ≤0,01* | ≤0,01* | ≤0,01* | ≤0,01* | ≤0,01* | ≤0,01* | ≤0,01* | ≤0,01* | ≤0,01* |
| **Change in CRT in ≥ 60 letters group** | -42 | -49 | -55 | -51 | -59 | -62 | -70 | -68 | -75 |
| **p-value** | 0,022* | ≤0,01* | ≤0,01* | ≤0,01* | ≤0,01* | ≤0,01* | ≤0,01* | ≤0,01* | ≤0,01* |
| Note: * indicates a statistically significant difference from baseline was detected  VA = Visual acuity  CRT = Central retinal thickness | | | | | | | | | |
